# Supplementary material for: Uncovering the Inhibitory Molecular Mechanism of Pomegranate Peel to Urinary Bladder Urothelial Carcinoma Using Proteomics Techniques
Source: MDPI journal article supplement (doi:10.3390/life12111839), 2022-11-09
Supplement: s1 [file s1]

## Antibodies

TCTP (1:10000, Abcam #ab133568, Waltham, MA USA), GNAQ (1:1000, St John's laboratory # STJ43766, London, UK), Bid (1:1000, Abcam #ab32060, Waltham, MA USA), tBid (1:1000, Abcam #ab108293, Waltham, MA USA),  $\beta$ -Actin (1:5000, Millipore #MAB1501, Darmstadt, Germany), Anti-rabbit IgG (1:10000, GE Healthcare #NA934, Wauwatosa, WI, USA), Anti-mouse IgG (1:10000, GE Healthcare #N931, Wauwatosa, WI, USA), Phospho-ASK1 (Ser83) (1:1000, Cell Signaling #3761, St. Louis, MO, USA), Phospho-ASK1 (Thr845) (1:1000, Cell Signaling #3765, St. Louis, MO, USA), ASK1 (1:2000, Abcam #ab45178, Waltham, MA USA), Phospho-STAT3 (Tyr705) (1:10000, Abcam #ab76315, Waltham, MA USA), STAT3 (1:1000, Abcam #ab109085, Waltham, MA USA), Phospho-JNK (T183/Y185) (1:1000, Signaling #4671, St. Louis, MO, USA)

## Collection and Identification of Plant Materials

Please refer to Nutrients 2018, 10, 543.

## Preparation of the Ethanol Extracts from Pulps and Peels of Pomegranates

Please refer to Nutrients 2018, 10, 543.

**Figure S1: The IPA results**

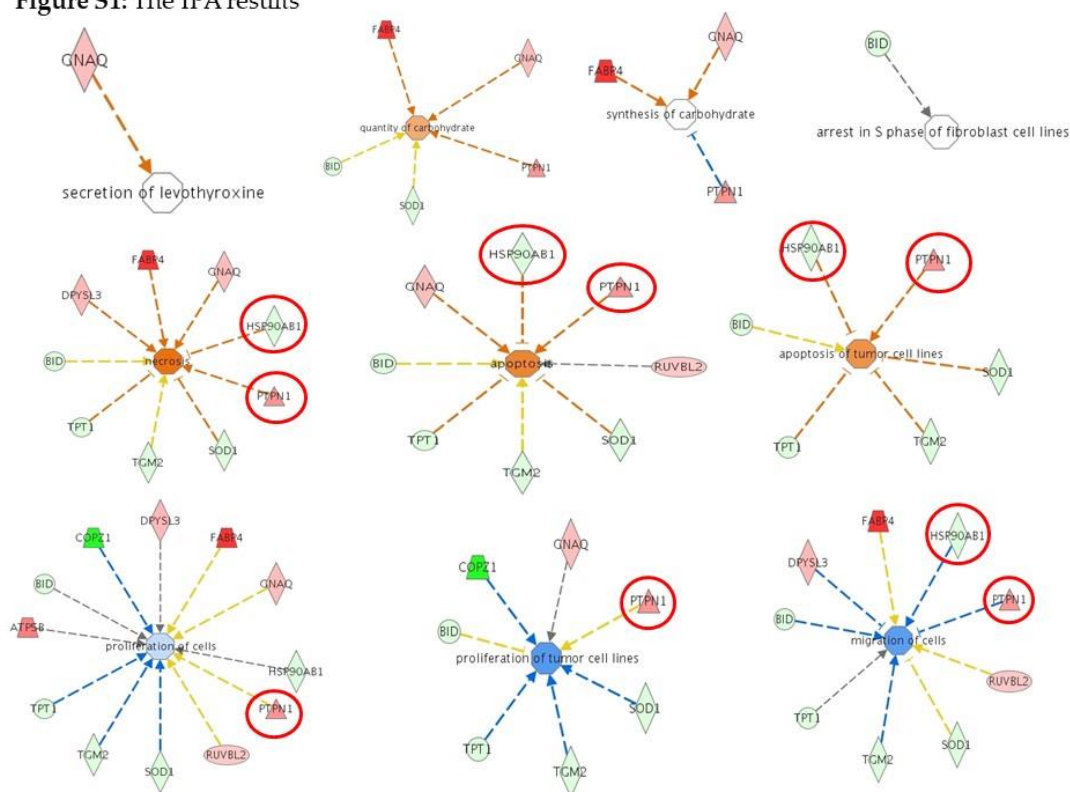

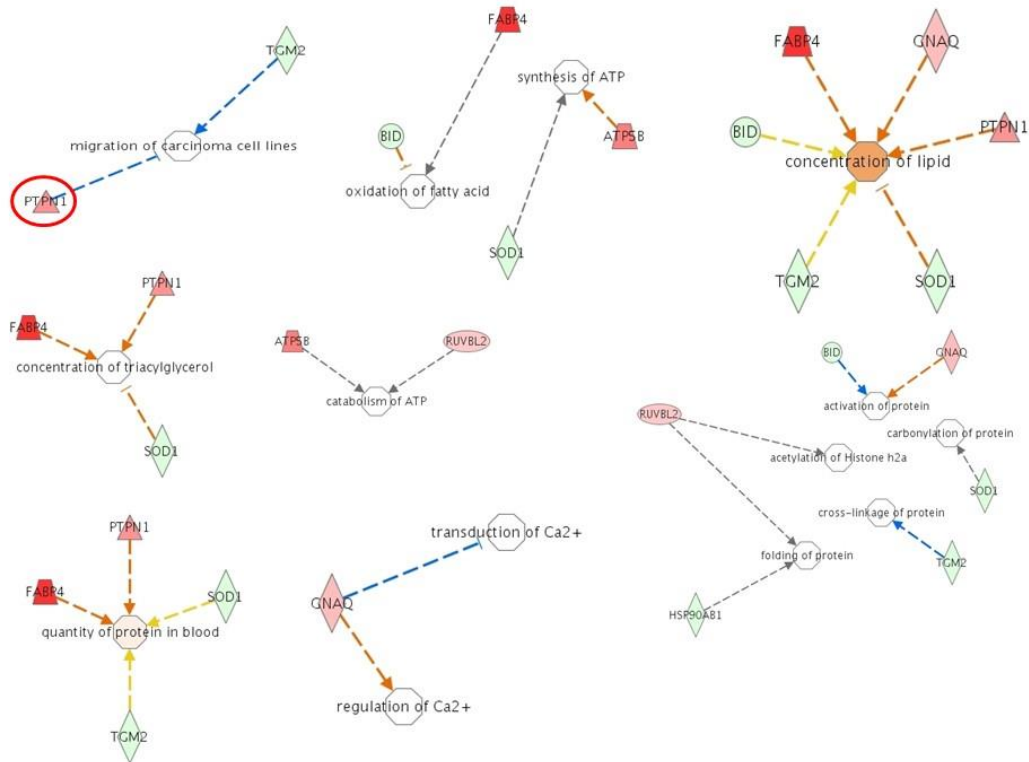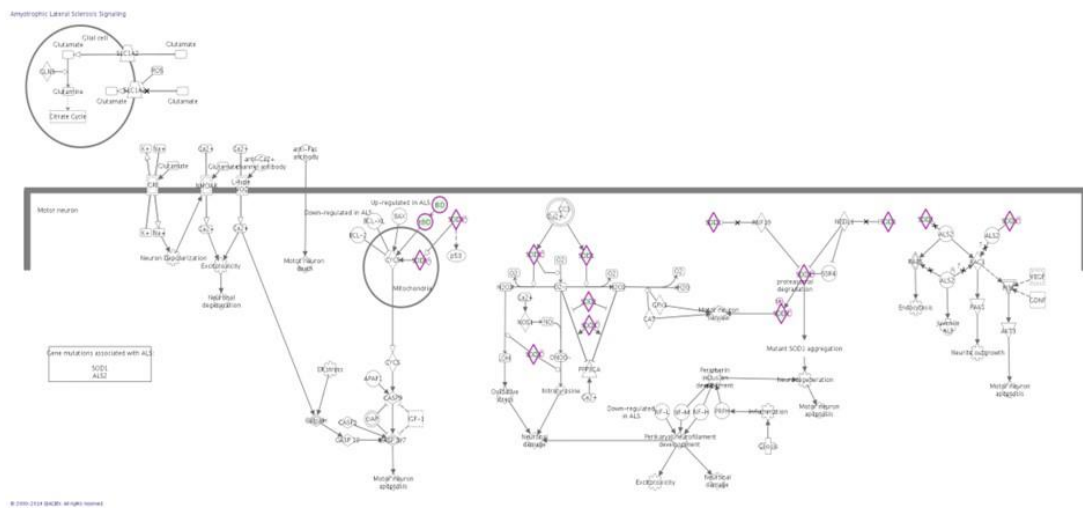

### Death Receptor Signaling

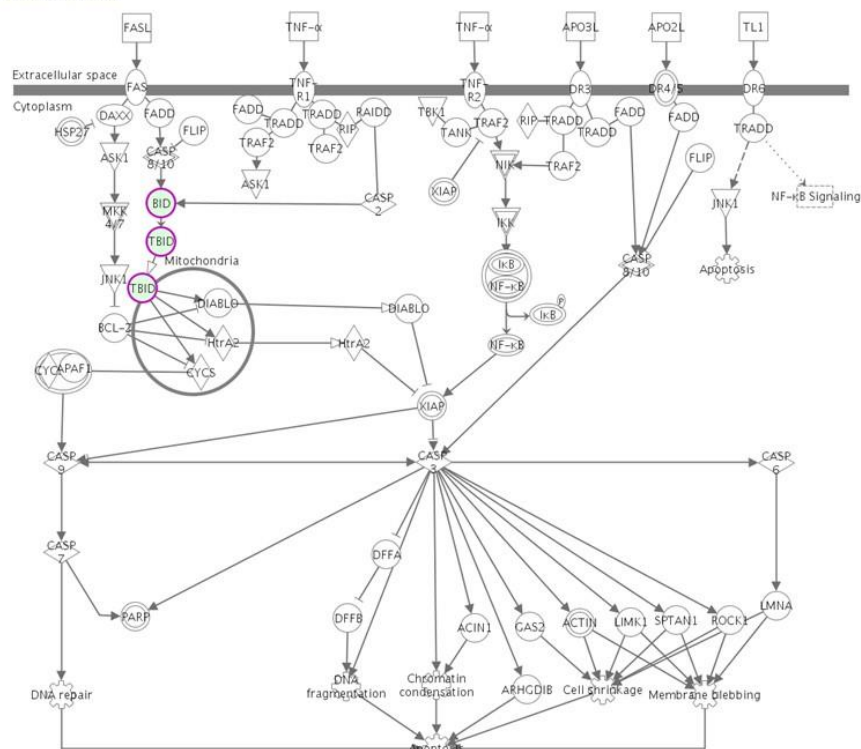

© 2000-2014 QIAGEN. All rights reserved.

### eNOS Signaling

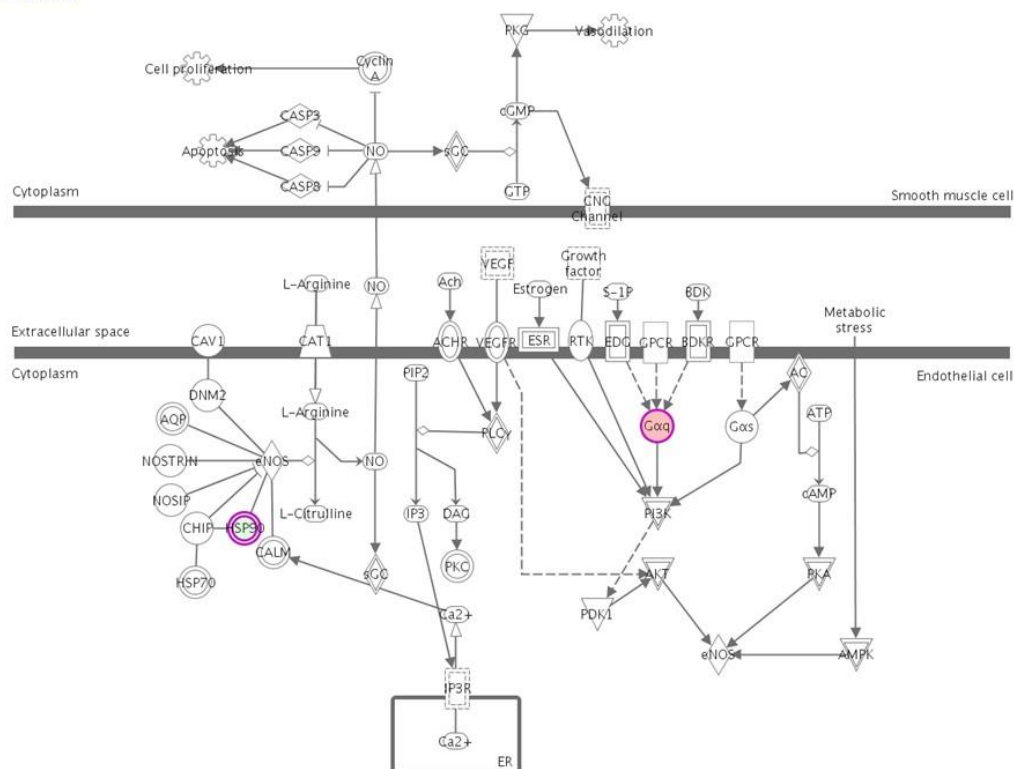

© 2000-2014 OIAFEN. All rights reserved

## JAK/Stat Signaling

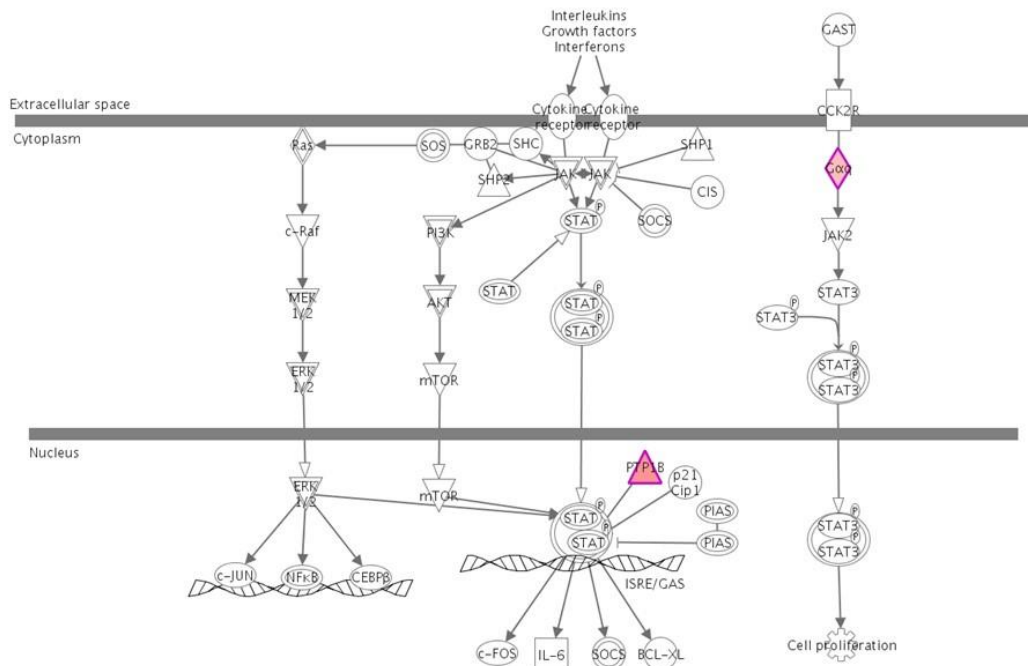

© 2000–2014 QIAGEN. All rights reserved.

## PPAR Signaling

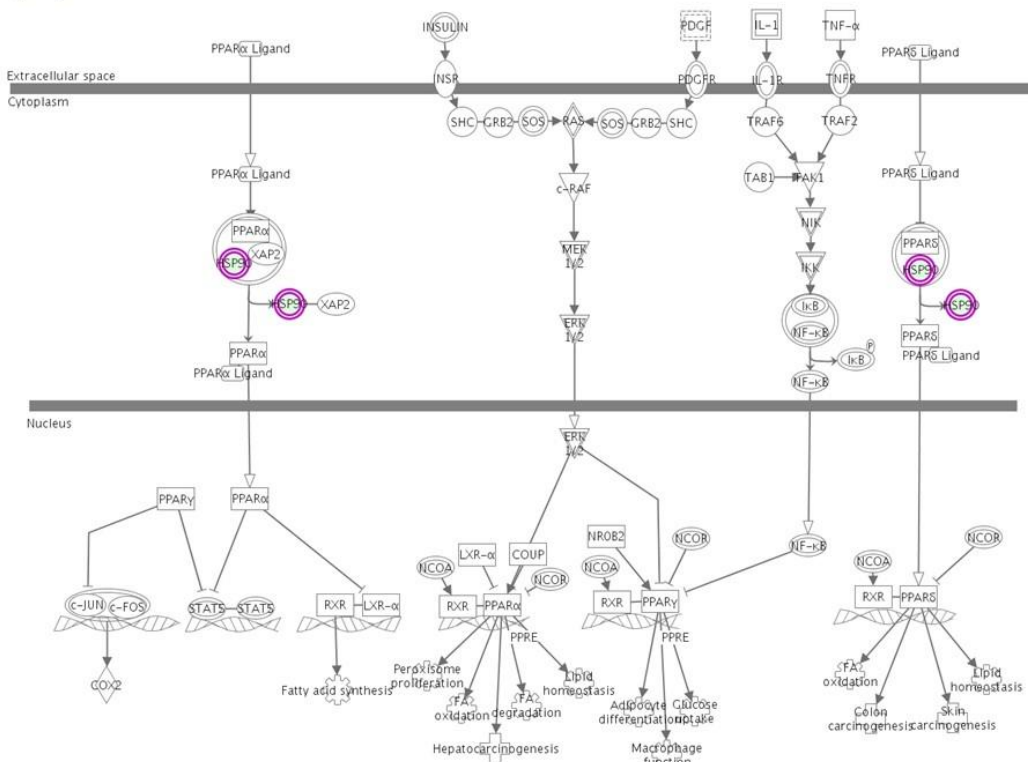

© 2000–2014 QIAGEN. All rights reserved.

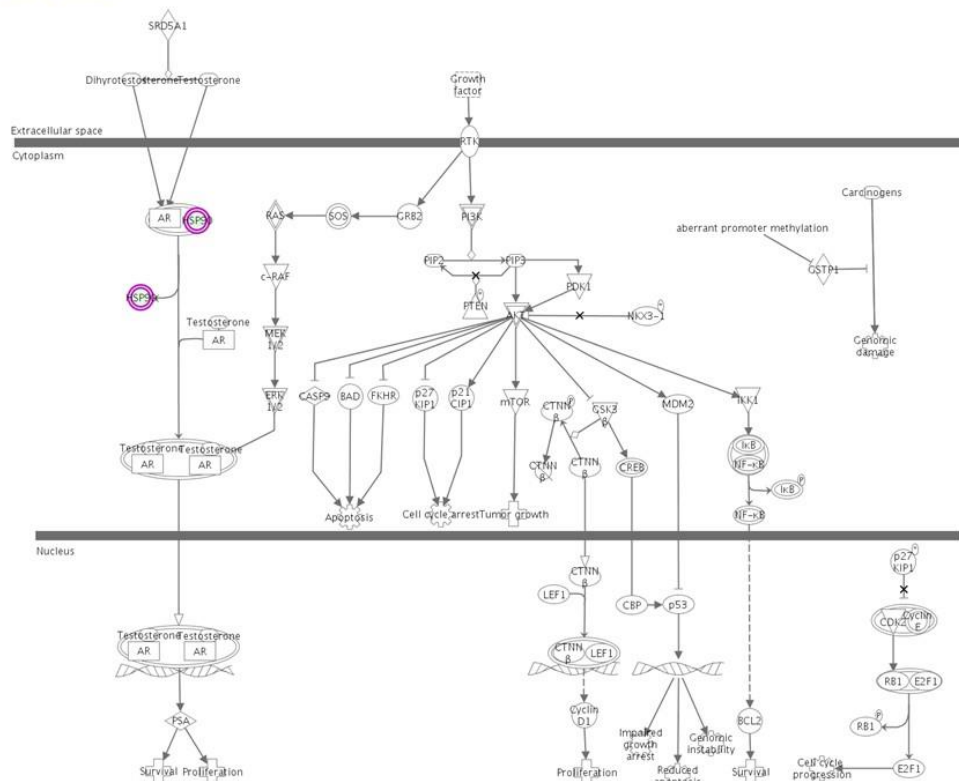

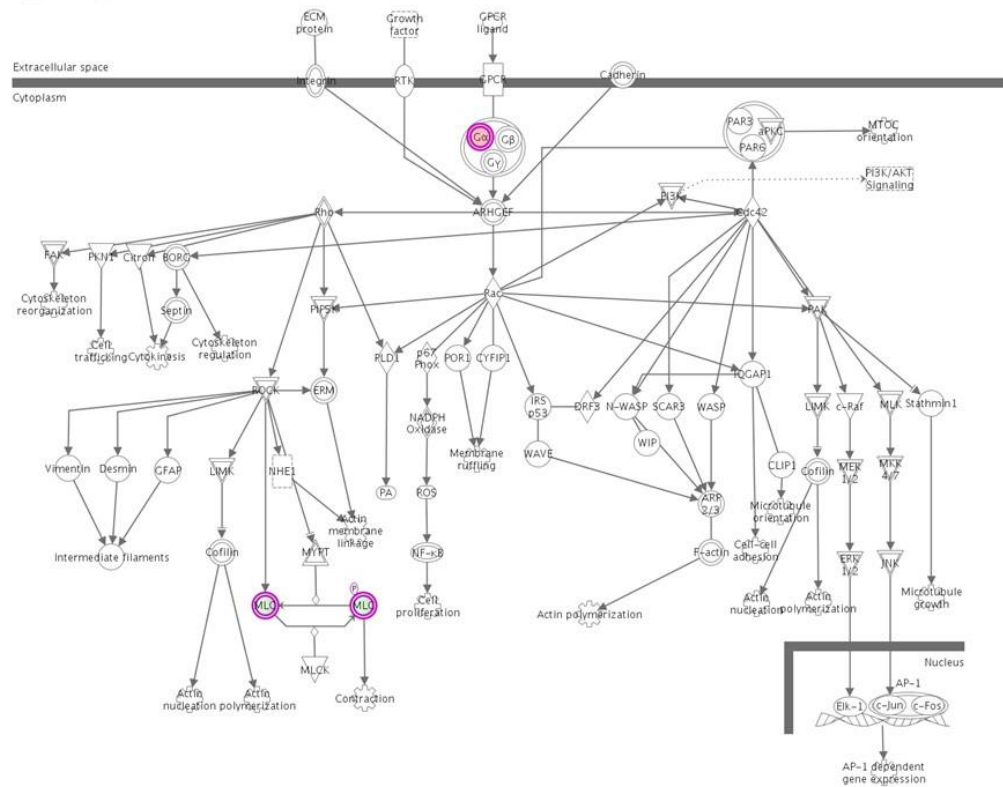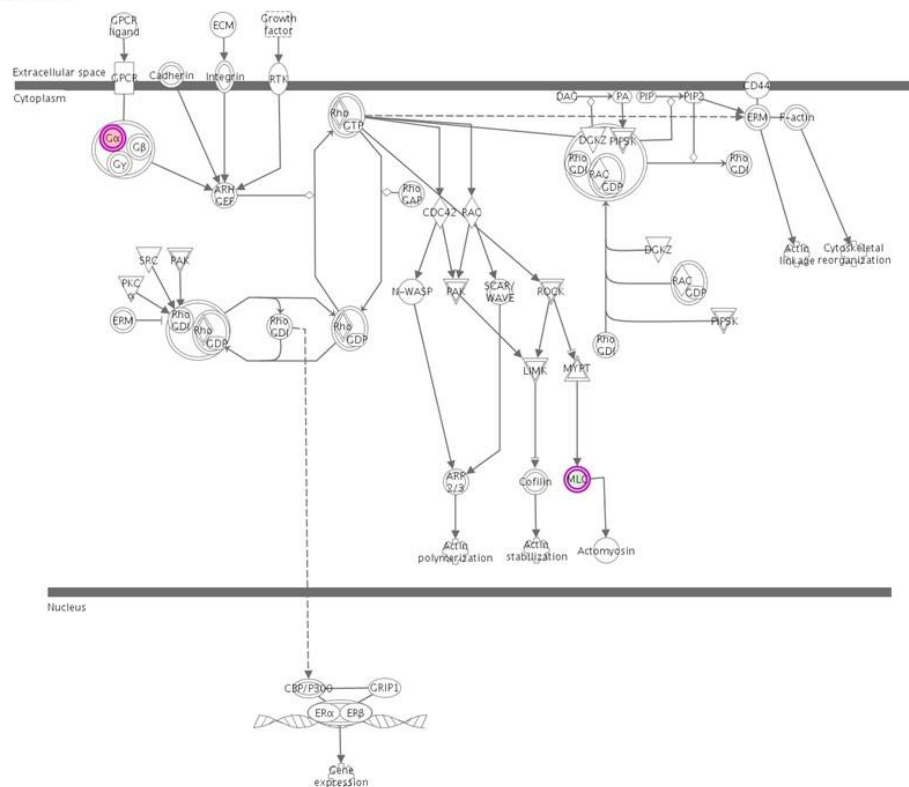





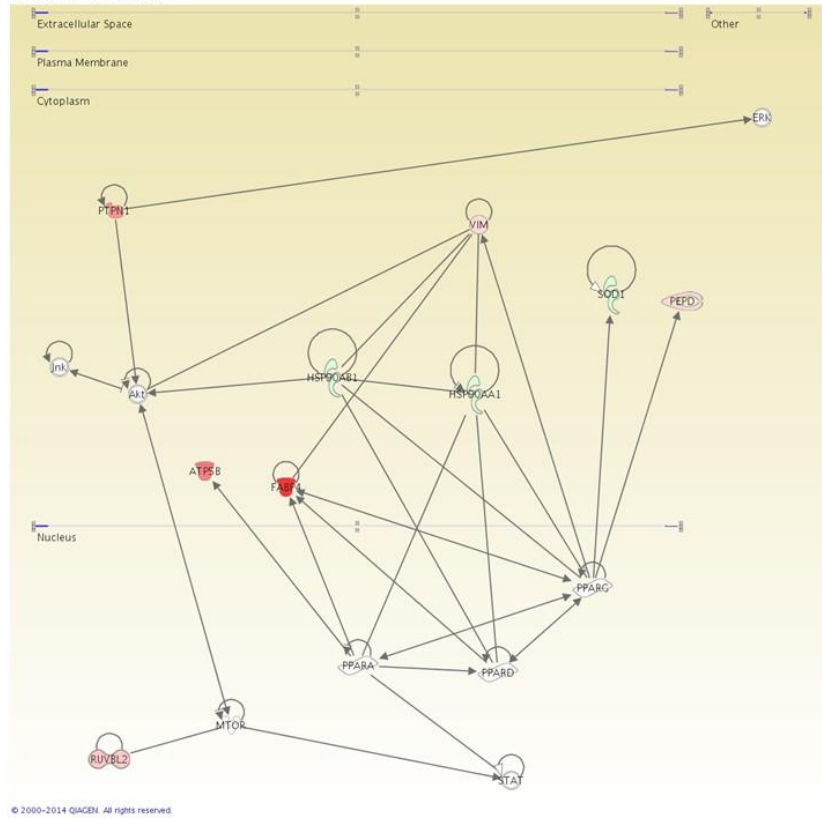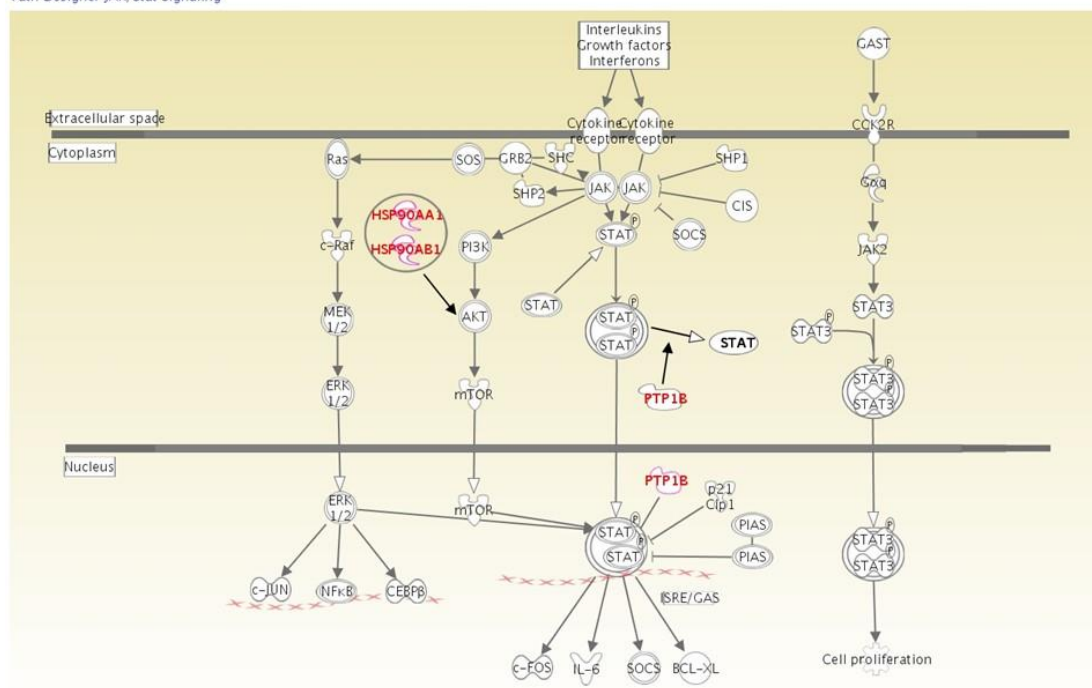



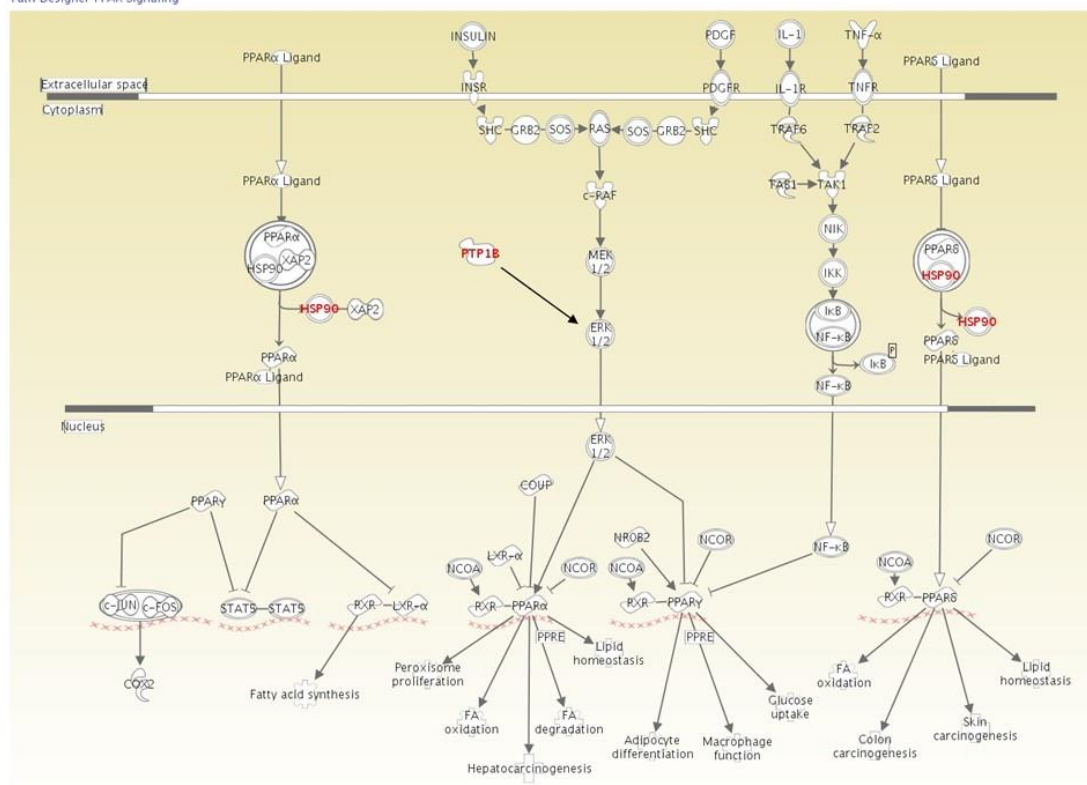**Table S1.** The volumes of each de-regulated protein spot.

| Spot number | Control (ppm±S.D.) | Treatment (ppm±S.D.) | P value |
|-------------|--------------------|----------------------|---------|
| Spot 1      | 260.25±145.48      | 29.27±12.12          | 0.0153  |
| Spot 2      | 421.65±85.72       | 51.90±32.67          | 0.0024  |
| Spot 3      | 316.60±71.50       | 6.24±2.28            | 0.0025  |
| Spot 4      | 221.94±41.62       | 59.60±19.99          | 0.0079  |
| Spot 5      | 669.22±131.03      | 91.52±21.28          | 0.0024  |
| Spot 6      | 138.46±50.49       | 34.42±11.12          | 0.0465  |
| Spot 7      | 229.62±58.18       | 55.38±15.82          | 0.0202  |
| Spot 8      | 255.98±70.35       | 102.12±32.49         | 0.0824  |
| Spot 9      | 102.73±14.71       | 263.52±40.56         | 0.0039  |
| Spot 10     | 12.20±4.33         | 111.22±20.80         | 0.0016  |
| Spot 11     | 187.06±92.95       | 13.26±9.61           | 0.0086  |

|         |               |              |        |
|---------|---------------|--------------|--------|
| Spot 12 | 242.74±73.76  | 38.22±9.02   | 0.0250 |
| Spot 13 | 9.92±2.71     | 46.00±8.50   | 0.0037 |
| Spot 14 | 43.64±9.03    | 165.88±25.06 | 0.0018 |
| Spot 15 | 586.52±196.74 | 119.22±25.01 | 0.0462 |
| Spot 16 | 95.30±19.74   | 252.78±45.11 | 0.0126 |
| Spot 17 | 28.56±8.79    | 416.14±63.14 | 0.0003 |
| Spot 18 | 19.58±7.99    | 148.18±30.13 | 0.0033 |
| Spot 19 | 30.38±13.21   | 152.36±38.50 | 0.0172 |

**Table S2.** The detailed mass spectrometry data of matched peptides

| Spot | Protein I.D.                                          | Matched <sup>2</sup><br>peptide<br>number | Sequence <sup>1</sup>                                                                                                                                                                                                                                    |
|------|-------------------------------------------------------|-------------------------------------------|----------------------------------------------------------------------------------------------------------------------------------------------------------------------------------------------------------------------------------------------------------|
| 1    | myosin light polypeptide 6 (MYL6)                     | 3                                         | NKDQGTIEDYVEGLR (2,4.12,0.48,1)<br>ALGQNPTNAEVLK (2,3.28,0.31,1)<br>VLGNPKSDEMNVK (2,3.18,0.32,1)                                                                                                                                                        |
| 2    | myosin regulatory light chain MRLC2 (MYL2)            | 7                                         | ATSNVFAMFDQSQIQEFK (2,6.33,0.57,1)<br>FTDEEVDELYREAPIDKK (3,3.90,0.14,1)<br>ELLTTMGDRFTDEEVDELYREAPIDK (3,3.43,0.43,3)<br>KGNFNYIEFTR (2,3.31,0.36,1)<br>GNFNYIEFTR (2,3.26,0.16,1)<br>DGFIDKEDLHDMLASLGK (3,3.06,0.40,2)<br>LNGTDPEDVIR (2,2.77,0.18,1) |
| 3    | coatomer protein complex, subunit zeta 1 (COPZ1)      | 3                                         | VALRGEDVPLTEQTVSQVLQSAK (3,5.53,0.54,1)<br>AILILDNDGDRLFAK (2,4.28,0.54,1)<br>YYDDTYPVKEQK (2,2.89,0.24,4)                                                                                                                                               |
| 4    | Chromobox protein homolog 3 (CBX3)                    | 6                                         | KVEEAEPEEFVVEKVLDR (3,5.40,0.55,1)<br>IIGATDSSGELMFLMK (2,5.32,0.65,1)<br>WKDSDEADLVLAKE (3,3.89,0.36,1)<br>SKKVEEAEPEEFVVEK (2,3.60,0.40,1)<br>DSDEADLVLAKE (2,3.22,0.36,1)<br>LTWHSCPEDEAQ (2,2.66,0.31,1)                                             |
| 5    | Human Translationally Controlled Tumor Protein (TCTP) | 3                                         | MIYRDLISHDEMFSDIYK (3,3.37,0.13,2)<br>DLISHDEMFSDIYKIR (3,2.96,0.42,1)<br>YIKDYMK (2,2.18,0.22,1)                                                                                                                                                        |
| 6    | Ran GTPase-activating protein 1 (RanGAP1)             | 14                                        | SSVLIAQQTDTSDPEKVVSAFLK (3,5.19,0.59,1)<br>MAVQDAVDALMQK (2,4.95,0.46,1)                                                                                                                                                                                 |

|    |                                                       |    |                                                                                                                                                                                                                                                                                                                                                                                                                                             |
|----|-------------------------------------------------------|----|---------------------------------------------------------------------------------------------------------------------------------------------------------------------------------------------------------------------------------------------------------------------------------------------------------------------------------------------------------------------------------------------------------------------------------------------|
|    |                                                       |    | DAALAVAEAMADKAELEK (2,4.76,0.55,1)<br>NRLENDGATALAEAFR (2,4.51,0.48,1)<br>VINLNDNTFTEK (2,4.15,0.47,1)<br>HSLLQTLYKV (2,3.7,0.48,1)<br>VINLNDNTFTEKGAVAMAETLK<br>(3,3.48,0.33,1)<br>SKGAVAIADAIR (3,3.31,0.44,1)<br>EIEDFDSLEALRLEGNTVGVEAAR<br>(3,3.25,0.26,1)<br>TQVAGGQLSFK (2,3.16,0.44,2)<br>KSSAQGKPLALK (2,3.03,0.34,2)<br>VSSVFKDEATVR (2,2.73,0.41,1)<br>SSAQGKPLALK (2,2.64,0.32,4)<br>GAVAMAETLKTLR (2,2.51,0.38,2)              |
| 7  | Heat shock protein<br>HSP 90-beta (HSP90-<br>β)       | 10 | NPDDITQEEYGEFYK (2,5.63,0.58,1)<br>HLEINPDHPIVETLR (2,4.43,0.54,1)<br>GVVDSEDLPLNISR (2,4.03,0.4,1)<br>YHTSQSGDEMTSLSEYVSR (3,3.87,0.56,1)<br>ELISNASDALDKIR (2,3.57,0.52,1)<br>ADLINNLGTIAK (2,3.42,0.46,1)<br>VILHLKEDQTEYLEER (3,3.27,0.44,1)<br>TLTLVDTGIGMTK (2,3.09,0.55,1)<br>EQVANSFAVER (2,2.83,0.44,3)<br>YIDQEELNKTPIWTR (3,2.71,0.43,3)                                                                                         |
| 8  | Heat shock protein<br>HSP 90-alpha (HSP90-<br>α)      | 6  | KHLEINPDHSIETLR (4,4.18,0.40,1)<br>HLEINPDHSIETLR (3,3.65,0.47,1)<br>NPDDITNEEYGEFYK (2,3.54,0.50,1)<br>ELISNSSDALDKIR (2,2.85,0.35,5)<br>DNSTMGYMAAK (2,2.79,0.38,1)<br>LGIHEDSQNR (2,2.64,0.42,1)                                                                                                                                                                                                                                         |
| 9  | vimentin (VIM)                                        | 13 | LQDEIQNMKEEMAR (2,4.23,0.53,1)<br>ILLAELEQLKGQ GK (2,4.19,0.39,1)<br>LQEEMLQREEAENTLQSFR (3,4.12,0.50,1)<br>TNEKVELQELNDR (2,3.85,0.43,1)<br>FADLSEAANR (2,3.65,0.43,1)<br>KVESLQEEIAFLK (2,3.48,0.32,1)<br>NLQEAEEWYKSK (2,3.44,0.42,1)<br>NLQEAEEWYK (2,3.40,0.32,1)<br>LGDLYEEEMR (2,3.16,0.30,1)<br>QDVDNASLAR (2,3.11,0.37,1)<br>DGQVINETSQHDDLE (2,3.04,0.34,2)<br>ISLPLPNFSSLNLR (2,2.56,0.36,1)<br>ETNLDSLPLVDTHSKR (2,2.47,0.43,4) |
| 10 | Mitochondrial ATP<br>synthase subunit beta<br>(ATP5B) | 18 | EGNLDLYHEMIESGVINLK (2,5.53,0.51,1)<br>TREGNDLYHEMIESGVINLKDATSK<br>(3,5.26,0.35,1)<br>LVLEVAQH LGESTVR (2,4.99,0.61,1)<br>FTQAGSEVSALLGR (2,4.95,0.53,1)<br>VALVYGQMNEPPGAR (2,4.90,0.57,1)<br>FLSQPFQVAEVFTGHMGK (2,4.85,0.56,1)<br>TVLIMELINNVAK (2,4.73,0.43,1)                                                                                                                                                                         |

|    |                                                                               |    |                                                                                                                                                                                                                                                                                                                                                                                                                                          |
|----|-------------------------------------------------------------------------------|----|------------------------------------------------------------------------------------------------------------------------------------------------------------------------------------------------------------------------------------------------------------------------------------------------------------------------------------------------------------------------------------------------------------------------------------------|
|    |                                                                               |    | IMDPNIVGSEHYDVAR (2,4.68,0.56,1)<br>SLQDIILGMDDELSEEDKLTCSR<br>(3,4.57,0.60,1)<br>GQKVLDSGAPIKIPVGPETLGR<br>(3,4.57,0.55,1)<br>AIAELGIYPAVDPLDSTSR (2,4.33,0.58,1)<br>VLDSGAPIKIPVGPETLGR (3,4.25,0.47,1)<br>EGNDLYHEMIESGVINLK (3,4.11,0.17,6)<br>IMNVIGEPIDERGPIKTK (2,3.63,0.46,1)<br>IPSAVGYQPTLATDMGTMQER<br>(3,3.63,0.40,1)<br>IGLFGGAGVGK (2,3.30,0.47,1)<br>ETRLVLEVAQHLGESTVR (3,3.08,0.33,12)<br>TIAM*DGTEGLVR (2,2.32,0.23,2) |
| 11 | Coactosin-Like Protein-1 (COTL1)                                              | 7  | TGTDKTLVKEVVQNFAK (3,5.32,0.61,1)<br>ELEEDFIKSELKK (2,4.26,0.32,1)<br>TLVKEVVQNFAK (2,3.81,0.42,1)<br>SKFALITWIGENVSGLQR (3,3.38,0.34,1)<br>EFVISDRKELEEDFIK (3,3.25,0.11,1)<br>FTTGDAMSKR (2,2.76,0.45,1)<br>AKTGTDKTLVK (2,2.38,0.25,2)                                                                                                                                                                                                |
| 12 | Pro-Apoptotic Protein Bid (Bid)                                               | 2  | LGRIEADSESQEDIIR (3,4.98,0.48,1)<br>HLAQVGDSMDR (2,3.42,0.46,1)                                                                                                                                                                                                                                                                                                                                                                          |
| 13 | Guanine nucleotide-binding protein alpha-q (GNAQ)                             | 6  | YYLNDLDRVADPAYLPTQQDVLR<br>(3,6.13,0.47,1)<br>VSAFENPYVDAIK (2,4.29,0.40,1)<br>VADPAYLPTQQDVLR (2,3.78,0.44,1)<br>IIHSGSGYSEDEK (2,3.53,0.1,1)<br>LLLLGTGESGK (2,2.87,0.24,1)<br>RINDEIER (2,2.46,0.15,3)                                                                                                                                                                                                                                |
| 14 | RuvB-like 2 ; 48 kDa<br>TATA box-binding protein interacting protein (RUVBL2) | 12 | ALESDFMAPVLIMATNR (2,4.58,0.58,1)<br>TQGFALFSGDTGEIKSEVR (3,4.12,0.55,1)<br>IRGTSYQSPHGIPIDLLDR (3,3.48,0.42,1)<br>LLIVSTTPYSEKDTK (2,3.42,0.41,2)<br>DKVQAGDVITIDKATGK (2,3.36,0.60,1)<br>EVVHTVSLHEIDVINSR (3,3.26,0.43,1)<br>GLGLDDALEPR (2,3.26,0.43,1)<br>AVLIAGQPGTGK (2,3.20,0.50,1)<br>QASQGMVGQLAAR (2,3.15,0.46,1)<br>ARDYDAMGSQTK (2,3.01,0.48,1)<br>RAAGVVLEMIR (2,2.94,0.28,16)<br>VYSFLDES (2,2.58,0.33,1)                 |
| 15 | Superoxide dismutase 1 (SOD1)                                                 | 4  | TLVVHEKADDLGKGGNEESTK<br>(3,5.69,0.26,1)<br>GDGPVQGIINFEQK (2,4.28,0.50,1)<br>HVGDLGNVTADK (2,3.09,0.50,1)<br>LACGVIGIAQ (2,2.65,0.25,1)                                                                                                                                                                                                                                                                                                 |
| 16 | Human Prolidase (PEPD)                                                        | 6  | NPAVQAGSIVVLQGGEETQR<br>(2,6.21,0.60,1)<br>YTNKISSEAHR (3,3.81,0.59,1)                                                                                                                                                                                                                                                                                                                                                                   |

|    |                                                |    |                                                                                                                                                                                                                                                                                                                                                    |
|----|------------------------------------------------|----|----------------------------------------------------------------------------------------------------------------------------------------------------------------------------------------------------------------------------------------------------------------------------------------------------------------------------------------------------|
|    |                                                |    | VFKTDMELEVL (2,3.53,0.47,1)<br>TDMELEVL (2,3.00,0.38,1)<br>LPASHATWMGK (2,2.94,0.53,1)<br>AVYEAVL (2,2.04,0.30,5)                                                                                                                                                                                                                                  |
| 17 | Fatty acid-binding protein 4 (FABP4)           | 2  | LVSENFDDYMKEVGVGFATRK (3,4.05,0.56,1)<br>NTEISFILGQEFDEVTADDRK (3,3.92,0.57,1)                                                                                                                                                                                                                                                                     |
| 18 | protein-tyrosine phosphatase 1B (PTP1B)        | 7  | IKLHQEDNDYINASLIKMEEAQR (4,4.66,0.51,1)<br>QLELENLTTQETR (2,4.30,0.27,1)<br>FSYLAVIEGAK (2,4.24,0.51,1)<br>FIMGDSSVQDQWK (2,3.80,0.49,1)<br>GSPLNAAPYGIESMSQDTEVR (3,3.66,0.44,1)<br>SGSWAAIYQDIR (2,3.44,0.39,1)<br>EMIFEDTNLK (2,2.67,0.24,4)                                                                                                    |
| 19 | dihydropyrimidinase-related protein 3 (DPYSL3) | 10 | MDENQFVAVTSTNAAK (2,5.27,0.11,1)<br>NLHQSGFSLSGTQVDEGVR (2,5.16,0.64,1)<br>ISVGSDSLVIWDPDAVK (2,5.02,0.55,1)<br>IMLEDGNLHVTQGAGR (2,4.86,0.59,1)<br>GMYDGPVFDLTTTPK (2,4.12,0.63,1)<br>TLDFDALSVGQR (2,3.90,0.54,1)<br>EESREPAPASPAGVEIR (3,3.41,0.20,9)<br>GMTTVDDFFQGTK (2,3.29,0.48,2)<br>SAADLISQAR (2,2.54,0.21,1)<br>IFNLYPR (2,2.41,0.29,4) |

<sup>1</sup>The numbers in parentheses correspond to z, Xcorr, dCn, Rsp parameters of TurboSequest respectively.

<sup>2</sup>Matched peptide number: number of peptides matched with protein in MS/MS query.
