# Supplementary figures and images for: Uncovering the Inhibitory Molecular Mechanism of Pomegranate Peel to Urinary Bladder Urothelial Carcinoma Using Proteomics Techniques
Source: MDPI journal article supplement (doi:10.3390/life12111839), 2022-11-09

Figure S2. Original blots.

Figure 1  
Control

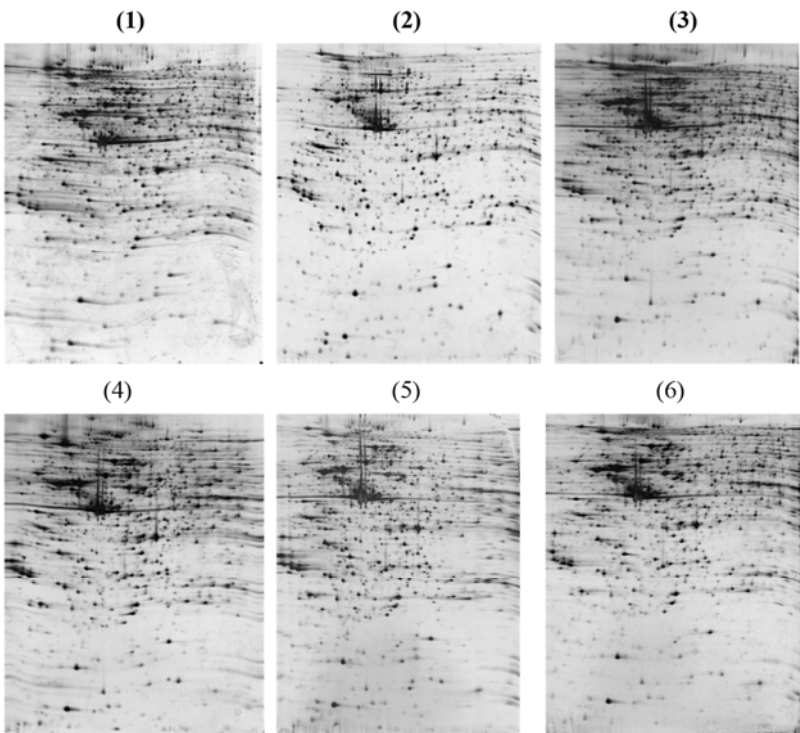

Treatment

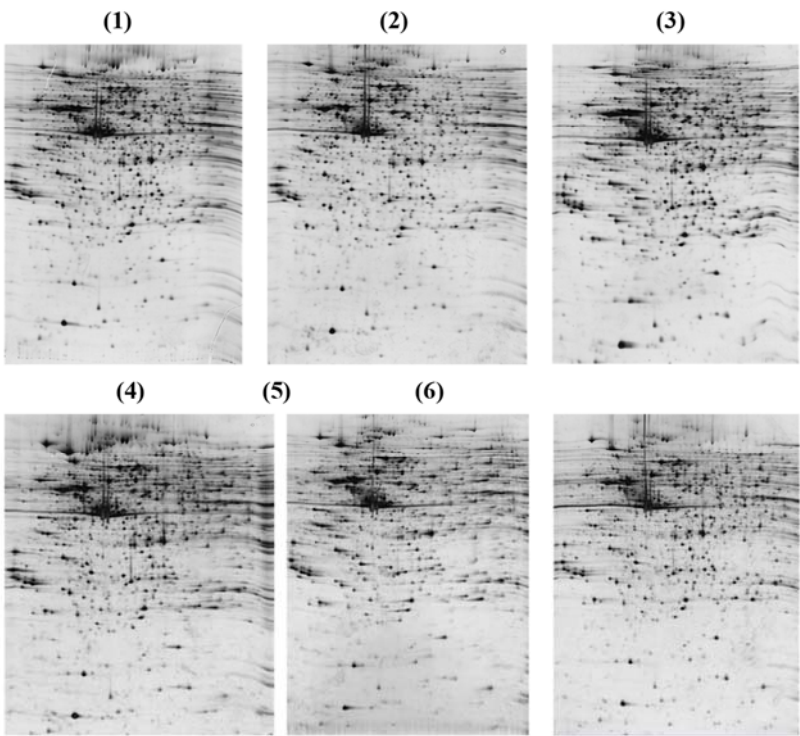

Figure 2a

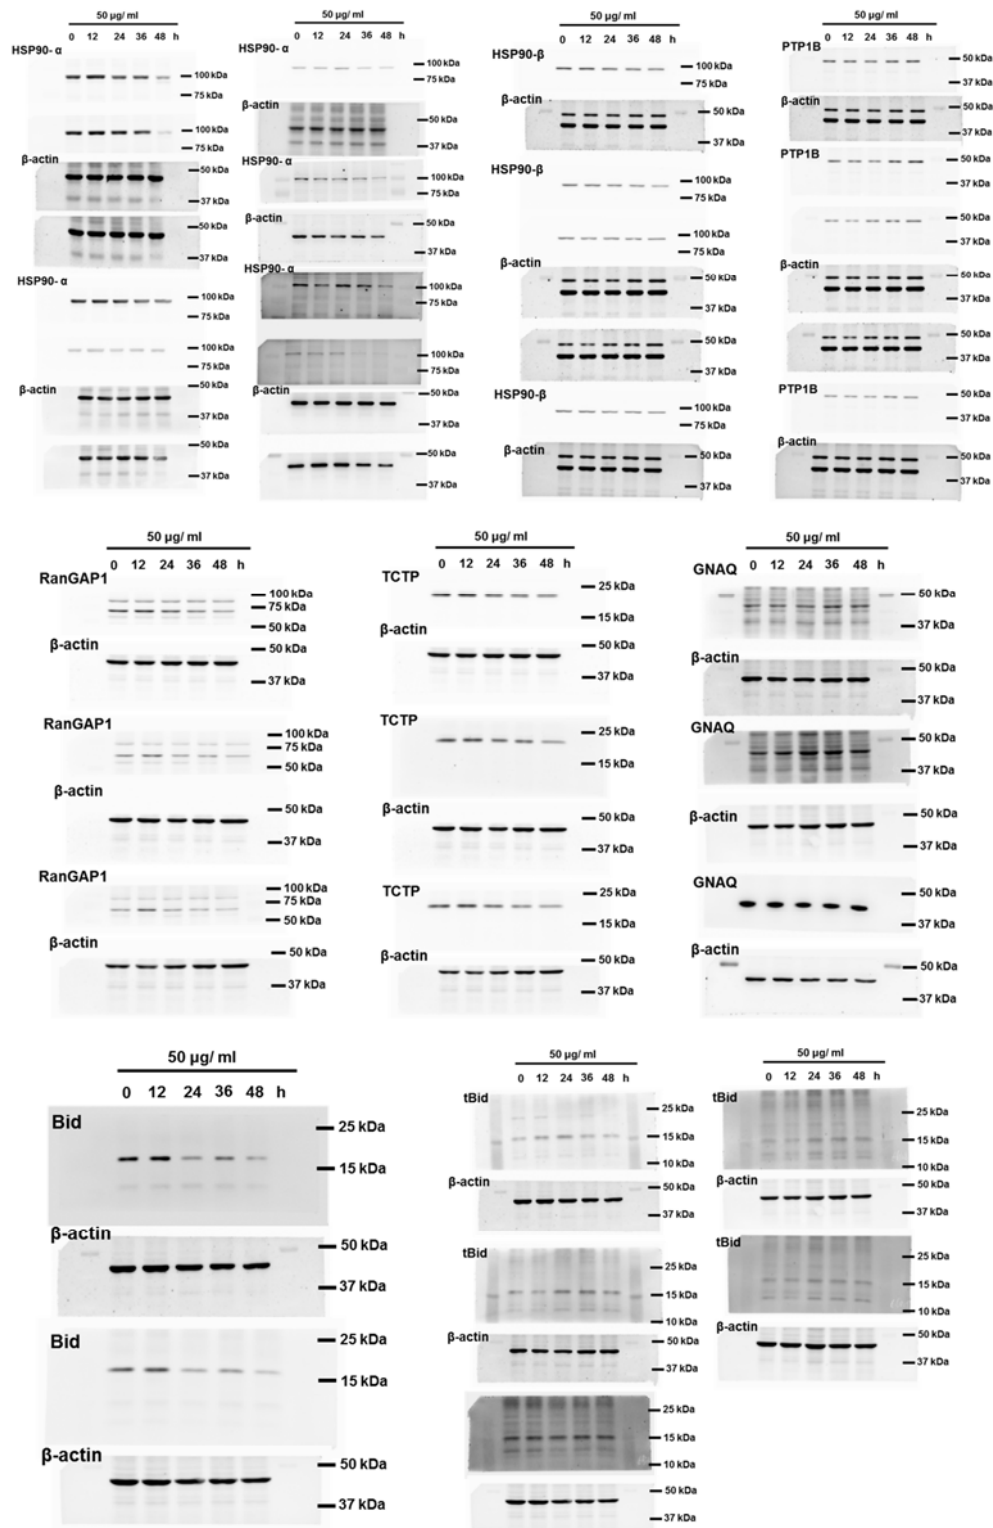

Figure 2b

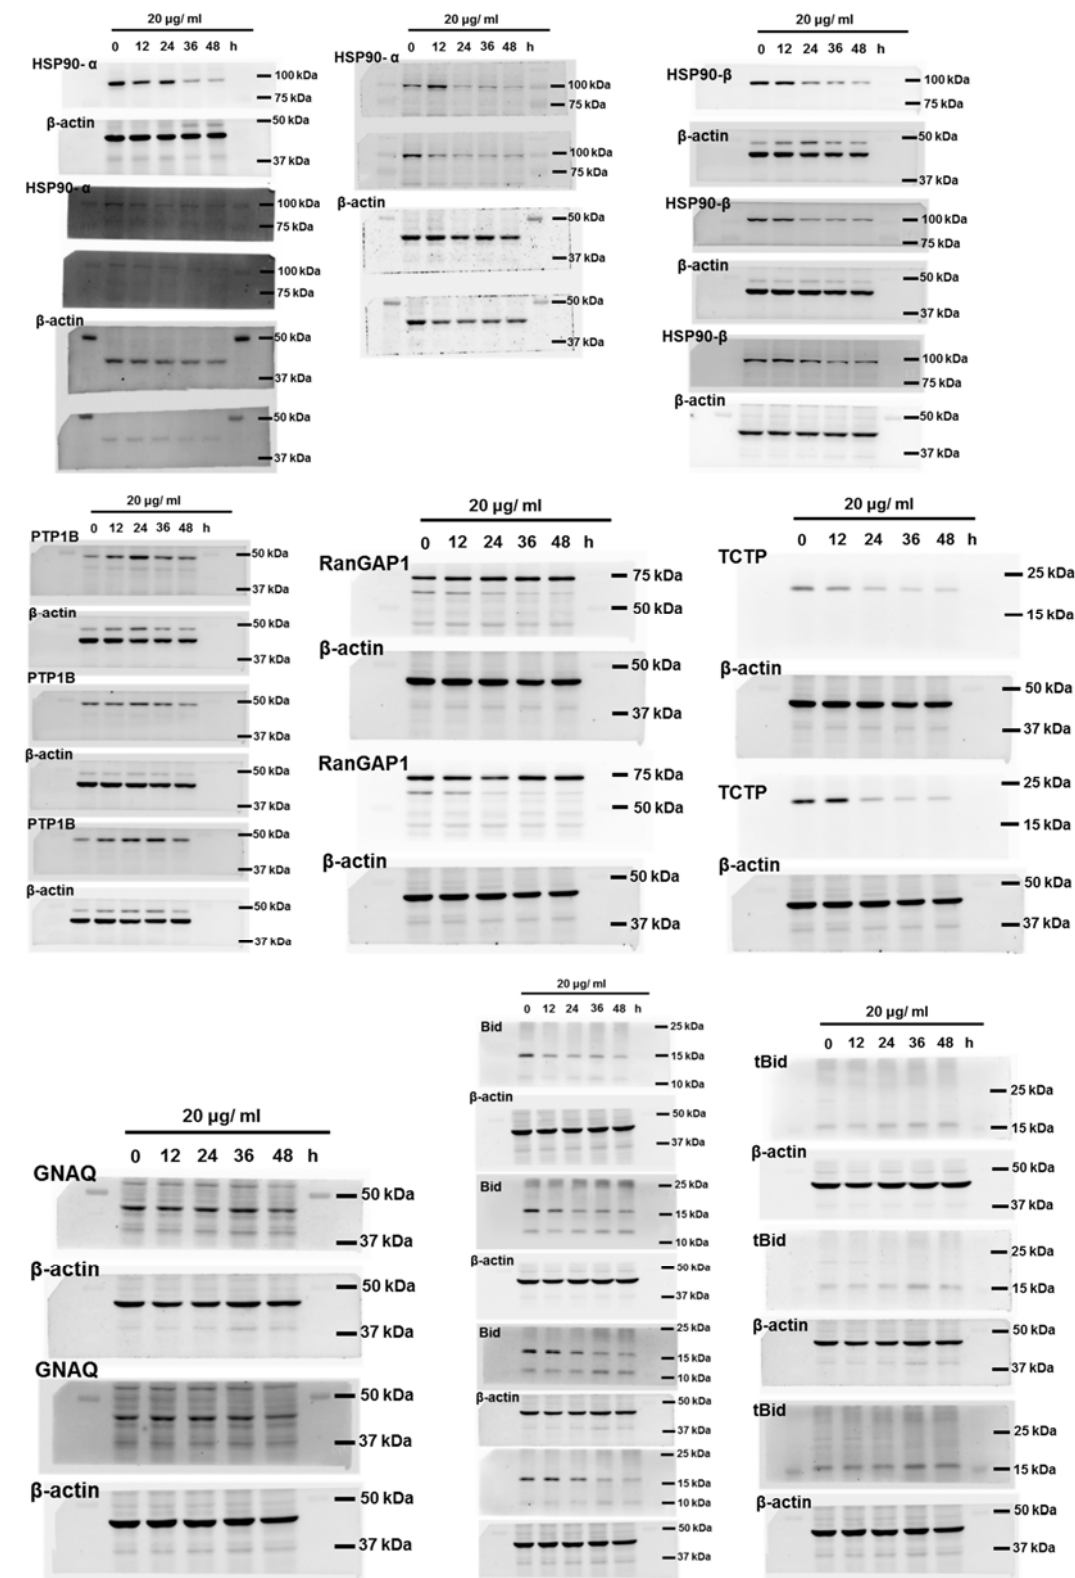

Figure 4a

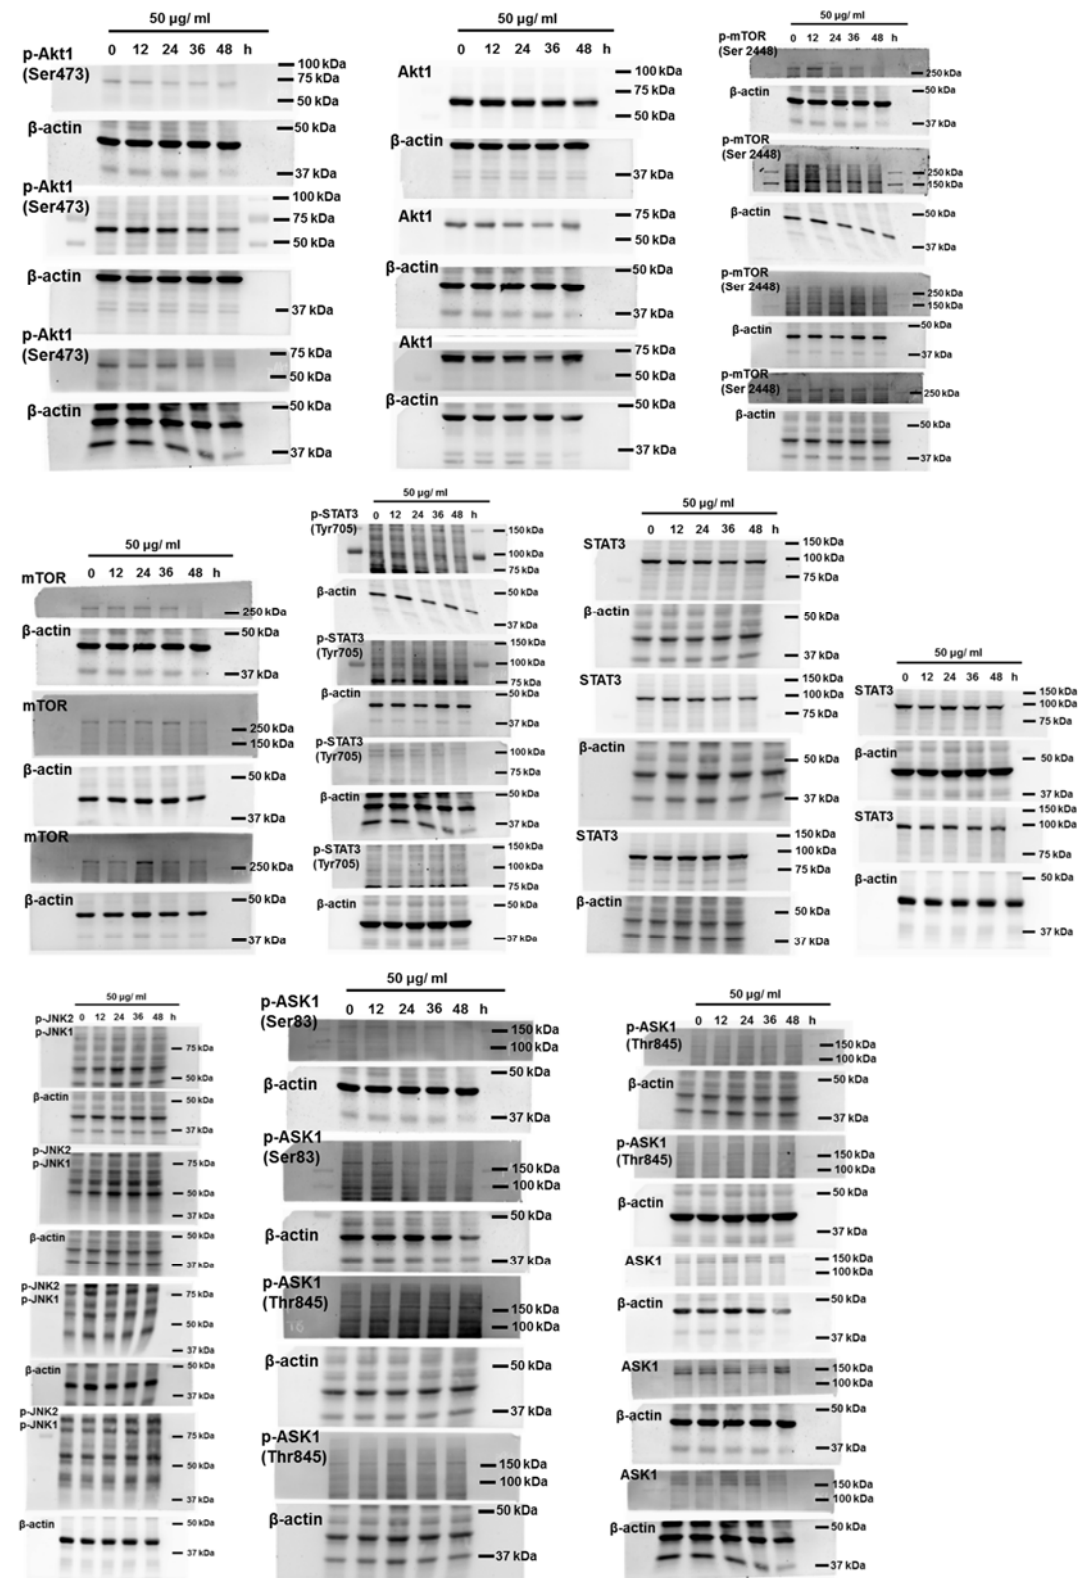

Figure 4b

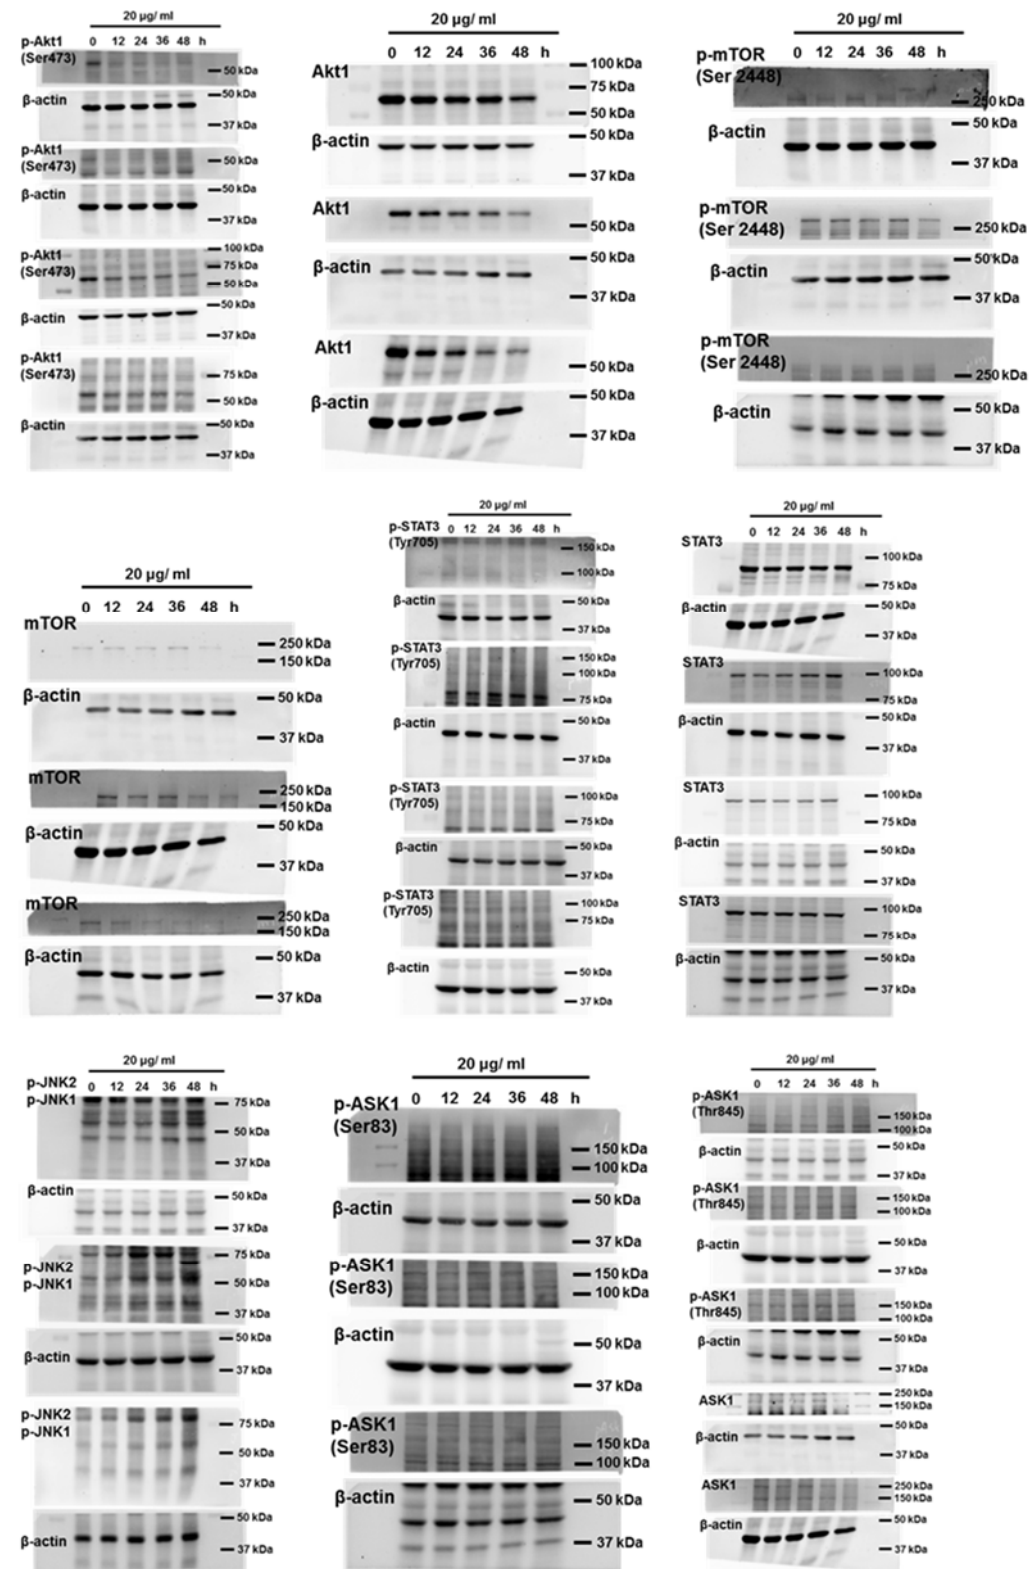

Supplement: s1 [file s1]
